# Supplementary material
Source: bioRxiv or medRxiv preprint supplement (http://www.biorxiv.org/highwire/filestream/26772/field_highwire_adjunct_files/0/094995-1.pdf)
Supplement: Supplementary file [file 094995-1.pdf]

## **Genetic footprint of population fragmentation and contemporary collapse in a freshwater cetacean**

Minmin Chen, Michael C. Fontaine<sup>\*</sup>, Yacine Ben Chehida, Jinsong Zheng, Zhigang Mei, Yujiang Hao, Kexiong Wang, Min Wu, Qingzhong Zhao, Ding Wang

### **Content**

---

**ESM Text S1.** Supplementary details on the ABC analyses.

**ESM Figure S1.** Maps showing the distribution of the Yangtze finless porpoises in the Yangtze River and sampling sites.

**ESM Figure S2.** Flow chart about inference of population history using ABC in the program DIYABC.

**ESM Figure S3.** Estimated probability of the data (X) given K group tested in *Structure*.

**ESM Figure S4.** Allelic richness estimated using ADZE for each group identified in *Structure*.

**ESM Table S1:** Model specification and prior distributions for demographic parameters. See figure 2 for the demographic parameters of each model tested.

**ESM Table S2.** Mutation model parameters for the ABC analysis figure 2.

**ESM Table S3.** Effective population size ( $N_e$ ) estimated in each population of the Yangtze finless porpoise.

**ESM Table S4.** Estimated recent migration (upper and lower matrix) and non-migration rates (along the diagonal) per generation between populations identified by *Structure*.

**ESM Table S5.** Model selection procedure and performance analysis for the ABC step 1.

**ESM Table S6.** Model checking for the first step.

**ESM Table S7.** Model selection procedure and performance analysis for the ABC step 2*bi* (figure 2*bi*).

**ESM Table S8:** Model checking for the ABC step 2*bi* (figure 2*bi*).

**ESM Table S9.** Model selection procedure and performance analysis for the ABC step 2*bii* (figure 2*bii*).

**ESM Table S10.** Model checking for the analysis for the ABC step 2*bii* (figure 2*bii*).

**ESM Table S11.** Parameter estimation for scenario SC2 in natural units (figure. 2*bii*).

**ESM Table S12.** Composite parameter for the scenario SC2 (see figure 2*bii*).

---

<sup>\*</sup> Corresponding authors: Michael C Fontaine ([mikafontaine@gmail.com](mailto:mikafontaine@gmail.com))

## ESM Text S1. Supplementary details on the ABC analyses

The parameters defining each scenario (i.e. population sizes, times of population size changes and splits, and mutation rates) were considered as random variables drawn from prior distributions (figure 2, ESM table S1, S2). For each simulation, DIYABC draw a value for each parameter from its prior distribution and performed coalescent simulations to generate a simulated POD with the same number of gene copies and loci per population as in the observed dataset. A set of 48 summary statistics (SS) describing within and among population genetic diversity were calculated with DIYABC for each POD and the observed data. Within population statistics for microsatellite loci included the mean number of alleles per locus (NAL), expected heterozygosity (HET), allele size variance (VAR),  $M_{GW}$  statistic of Garza & Williamson across loci [1]. Between population statistics for microsatellites included  $F_{ST}$  [2], shared allele distance (DAS) [3], and  $(\delta\mu)^2$  Goldstein's distance [1,4]. For the mtDNA data, the descriptive statistics within populations include the number of haplotype (NAH), the number of segregating sites (NSS), the mean pairwise differences (MPD) and its variance (VPD), Tajima's  $D$ , and the number of private segregating sites (PSS). Statistics computed between groups were the mean of within sample pairwise differences (MP2), mean of between sample pairwise differences (MPB), and  $H_{ST}$  between two samples [2,5]. A Euclidean distance was calculated between the statistics obtained for each normalized PODs and observed dataset [3,6].

Coalescent simulations assume a mutation model for each type of loci. The mutation model for microsatellite loci was a generalized stepwise-mutation (GSM) model [7] with two parameters: a mean mutation rate ( $\bar{\mu}_{mic}$ ) and mean of the geometric distribution for the length, in repeat numbers, of mutation events ( $\bar{P}$ ) drawn from uniform prior distributions ( $\bar{\mu}_{mic} : [10^{-3} - 10^{-4}]$  and  $\bar{P} : [0.1-0.3]$ , see Table S2). We accounted for variation in  $\mu_{mic}$  and  $P$  among loci by drawing their individual values from a gamma distribution (Table S2). These settings allowed for large mutation rate variance across loci (i.e. range of  $10^{-5}$  to  $10^{-2}$ ). We also considered mutations inserting or deleting a single nucleotide in the microsatellite sequence.

We used jModelTest 2.1.7 [8] to identify the best substitution model describing the sequence variation of the mtDNA-CR and estimate its parameter. The best mutation model was a HKY+I+G model [9] with a proportion of constant sites of 16%, and a shape of the gamma

distribution of mutations among sites equal to 99.8 (Table S1). We assumed a per-site and per-generation mutation rate ranging uniformly between  $1 \times 10^{-7}$  and  $1 \times 10^{-5}$ , as found in the literature [10,11].

The PPr of each competing scenario was estimated using a polychotomous logistic regression [12,13] on the 1% of simulated datasets closest to the observed dataset (lowest Euclidean distance  $\delta$ ), subject to a linear discriminant analysis as a pre-processing step (to reduce the dimensionality of the data) [14]. The best-fitting scenario was selected based on the highest PPr value with a non-overlapping 95% confidence interval (95% CI). We estimated the posterior distributions of each demographic parameter under the best demographic model, by carrying out local linear regressions on the 1% closest of  $10^6$  simulated data sets, after a logit transformation to parameter values [6,12].

We evaluated the ability of the ABC analysis to discriminate between the competing scenarios by analysing 300 simulated data sets with the same number of loci and individuals as our real data set. Following Cornuet *et al.* [13], we estimated the Type-I error rate as the proportion of instances in which the selected scenario did not show the highest posterior probability among the competing scenarios, for the 300 simulated datasets generated under the best-supported scenario. Similarly, we estimated the Type-II error rate, by simulating 300 data sets for each of the other competing scenarios and calculating the mean proportion of instances in which the best-supported model was incorrectly selected as the most probable scenario. Finally we conducted a model checking procedure implemented in DIYABC to evaluate the goodness-of-fit between the posterior parameter distribution and the observed data following [15]. For this analysis, we simulated 1,000 pseudo-observed datasets under each model-posterior combination, with sets of parameter values drawn with replacement from the parameter posterior distribution. This generated a posterior cumulative distribution function for each summary statistic allowing us to estimate how well each fitted model can reproduce the observed summary statistics.

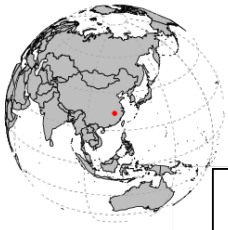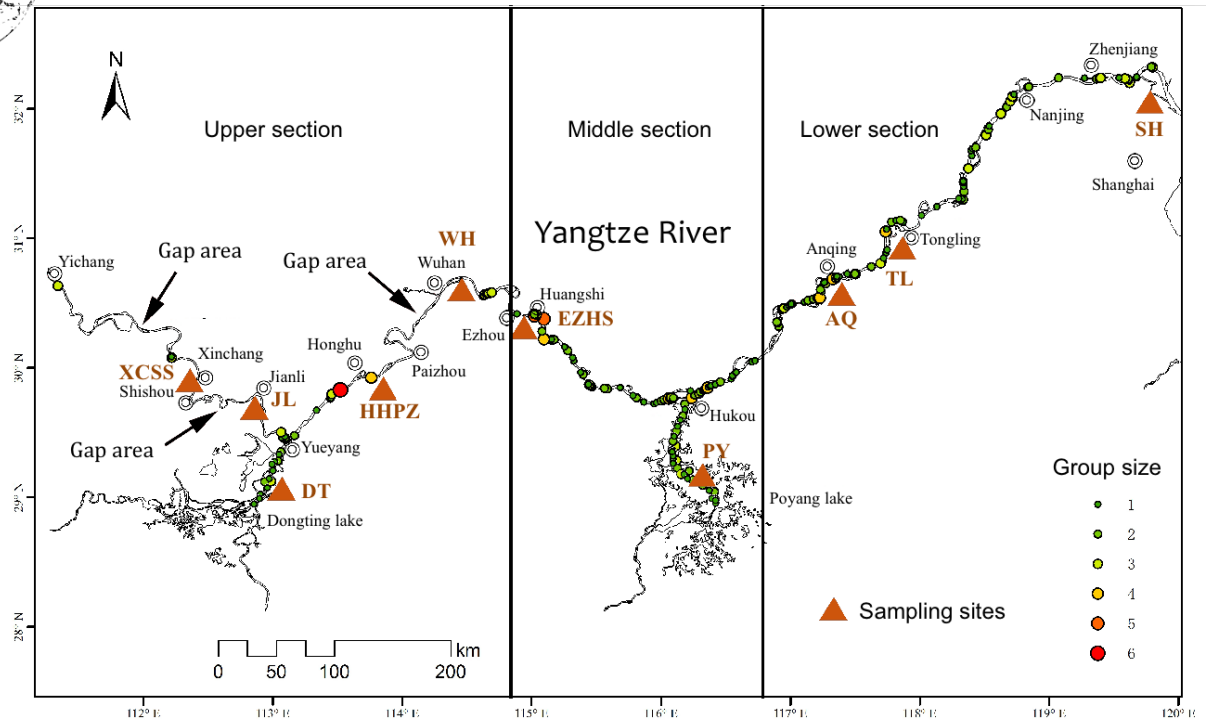

**Figure S1.** Maps showing the distribution of the Yangtze finless porpoises in the Yangtze River and sampling sites. Orange triangles show the locations of each sampling site and their acronyms. Sightings and distribution gaps reported during field surveys [16-18] are shown with color-coded dots and arrows, respectively. The top-left insert show the location of the Poyang Lake (red dot) on globe.

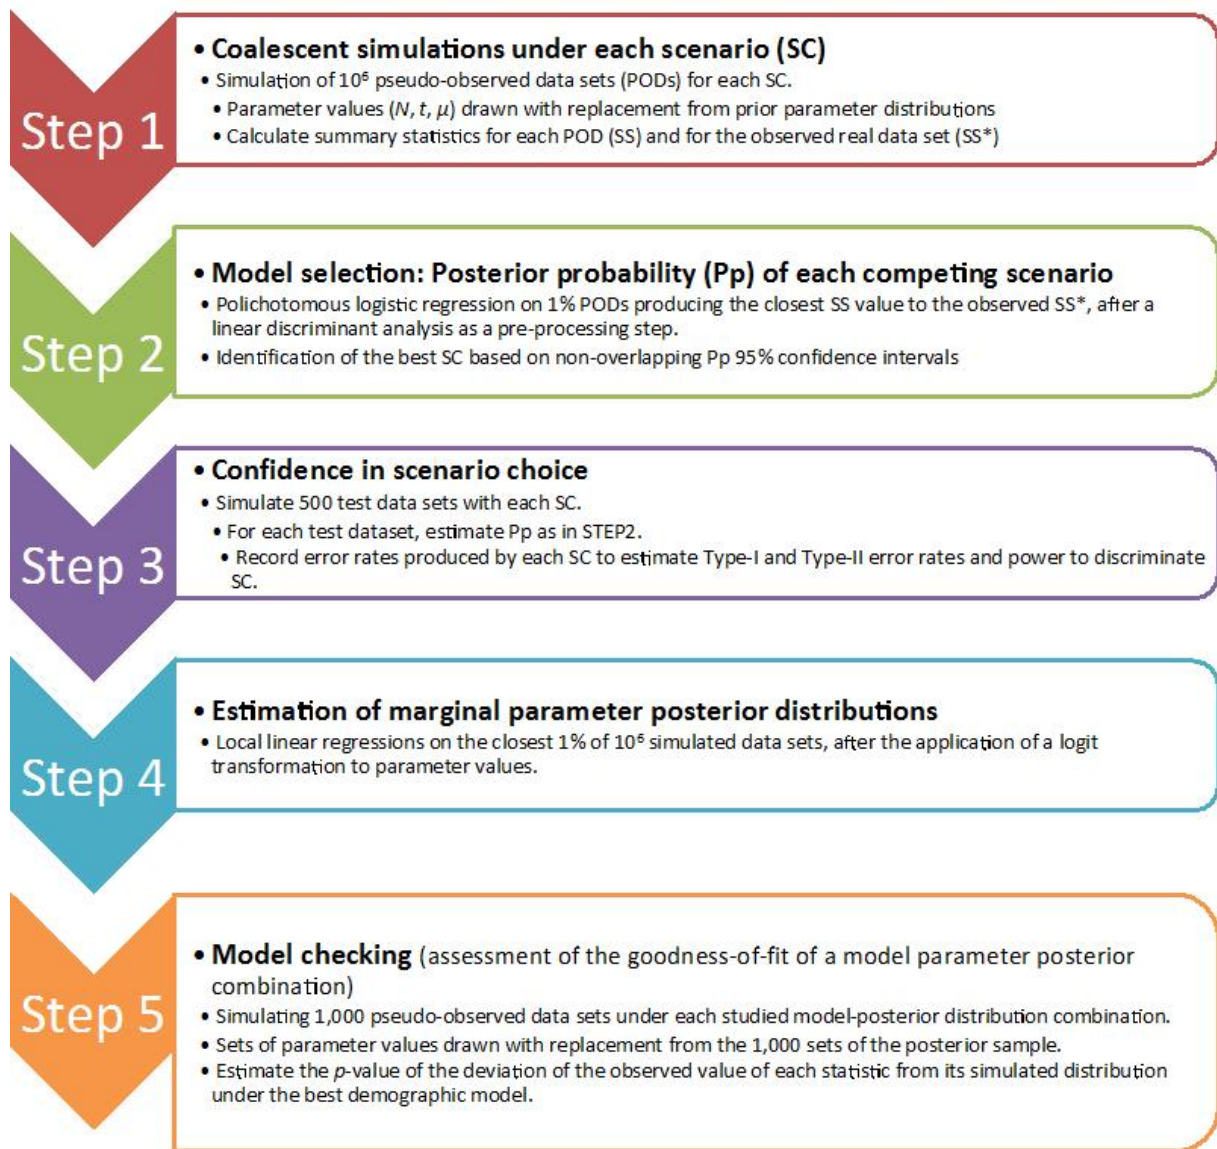

**Figure S2.** Flow chart about inference of population history using ABC in the program DIYABC.

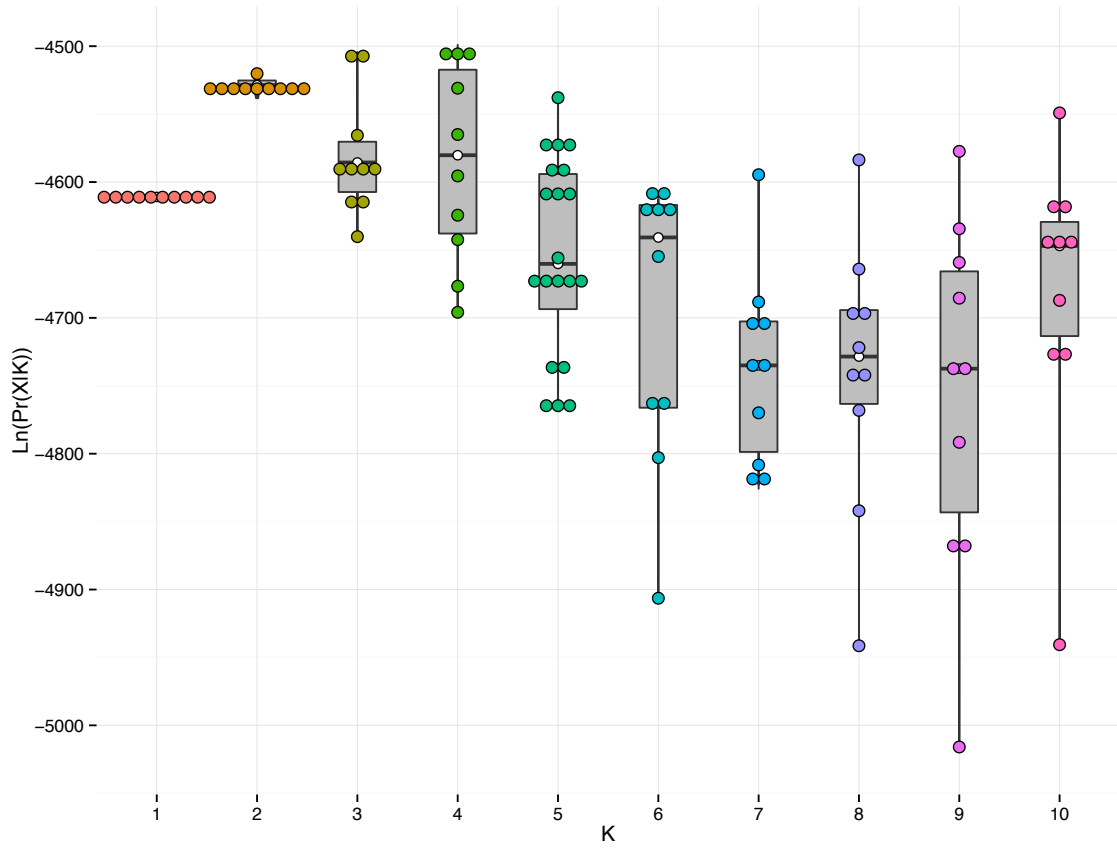

**Figure S3.** Estimated probability of the data (X) given K group tested in *Structure*.

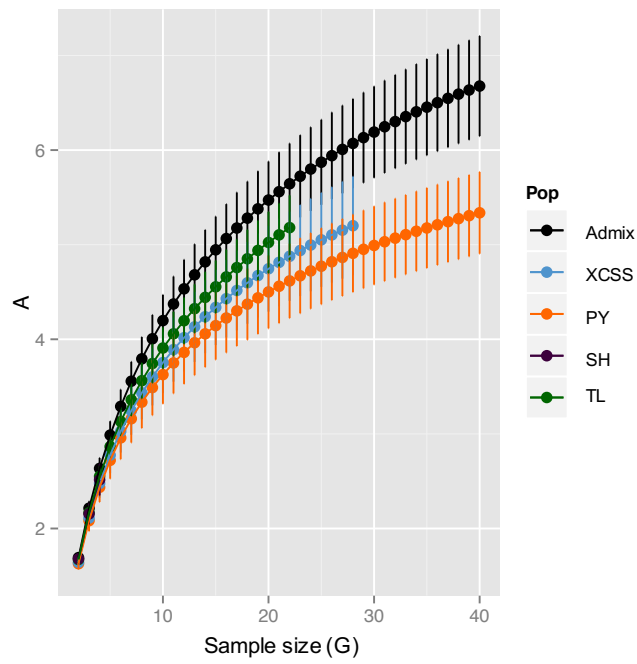

**Figure S4.** Allelic richness estimated using ADZE [19] for each group identified in *Structure*. Variation in  $Ar$  and  $pA$  are provided as a function of the sample size considered in the rarefaction procedure.

**Table. S1:** Model specification and prior distributions for demographic parameters.  
See figure 2 for the demographic parameters of each model tested.

| <i>Step 2a.</i>              |             |                |
|------------------------------|-------------|----------------|
| <b>Demographic Parameter</b> | <b>Type</b> | <b>Prior</b>   |
| $N_1$                        | N           | UN~[1–5,000]   |
| $N_2$                        | N           | UN~[1–5,000]   |
| $N_3$                        | N           | UN~[1–5,000]   |
| $N_a$                        | N           | UN~[10–20,000] |
| $N_{T1}$                     | N           | UN~[10–10,000] |
| $T_{\text{rad}}$             | T           | UN~[10–5,000]  |
| $T_1 (< T_2)$                | T           | UN~[10–10,000] |
| $T_2$                        | T           | UN~[10–10,000] |

Type of parameters: (N) effective population size, (T) time of the event in generation. Uniform distribution (UN) with 2 parameters: min and max; Gamma distribution (GA) with 4 parameters: min, max, mean and shape; Log-Uniform (LU) distribution with 2 parameters: min and max.



**Table. S1 (Continue) - Step 2b<sub>i</sub>**

| <b>Demographic Parameter</b> | <b>Type</b> | <b>Prior</b>   |
|------------------------------|-------------|----------------|
| N11                          | N           | UN~[1-5000]    |
| N21                          | N           | UN~[1-5000]    |
| N31                          | N           | UN~[1-5000]    |
| Tanc1                        | T           | UN~[10-5000]   |
| Nanc1                        | N           | UN~[10-20000]  |
| N12 (>Nbot12)                | N           | UN~[1-5000]    |
| N22 (>Nbot22)                | N           | UN~[1-5000]    |
| N32 (>Nbot32)                | N           | UN~[1-5000]    |
| Texp2                        | T           | UN~[10-5000]   |
| Nbot12                       | N           | UN~[1-10]      |
| Nbot22                       | N           | UN~[1-10]      |
| Nbot32                       | N           | UN~[1-10]      |
| db2                          | T           | UN~[1-10]      |
| Nanc2                        | N           | UN~[10-20000]  |
| N13 (<Nexp3)                 | N           | UN~[1-5000]    |
| N23 (<Nexp3)                 | N           | UN~[1-5000]    |
| N33 (<Nexp3)                 | N           | UN~[1-5000]    |
| Tisol3 (<Texp3)              | T           | UN~[10-5000]   |
| Nexp3                        | N           | UN~[11-10000]  |
| Texp3                        | T           | UN~[10-5000]   |
| Nbot3 (<N13, N23, N33)       | N           | UN~[1-10]      |
| db3                          | T           | UN~[1-10]      |
| Nanc3                        | N           | UN~[10-20000]  |
| N14                          | N           | UN~[1-100]     |
| N24                          | N           | UN~[1-100]     |
| N34                          | N           | UN~[1-100]     |
| Tcrash14                     | T           | UN~[1-50]      |
| Niso14 (<Nexp4)              | N           | UN~[101-5000]  |
| Tcrash24                     | T           | UN~[1-50]      |
| Niso24 (<Nexp4)              | N           | UN~[101-5000]  |
| Tcrash34                     | T           | UN~[1-50]      |
| Niso34 (<Nexp4)              | N           | UN~[101-5000]  |
| Tisol4 (<Texp4)              | T           | UN~[51-5000]   |
| Nexp4                        | N           | UN~[101-10000] |
| Texp4                        | T           | UN~[51-5000]   |
| Nbot4                        | N           | UN~[1-10]      |
| db4                          | T           | UN~[1-10]      |
| Nanc4                        | N           | UN~[10-20000]  |
| N15 (<Nexp5)                 | N           | UN~[1-5000]    |
| N25 (<Nexp5)                 | N           | UN~[1-5000]    |
| N35 (<Nexp5)                 | N           | UN~[1-5000]    |
| Tisol5 (<Texp5)              | T           | UN~[10-5000]   |
| Nexp5 (>Nfond5)              | N           | UN~[10-10000]  |
| Texp5                        | T           | UN~[10-5000]   |
| Nfond5                       | N           | UN~[1-10]      |
| N16 (<Nexp6)                 | N           | UN~[1-5000]    |
| N26 (<Nexp6)                 | N           | UN~[1-5000]    |
| N36 (<Nexp6)                 | N           | UN~[1-5000]    |
| Tisol6 (<Texp6)              | T           | UN~[10-5000]   |
| Nexp6                        | N           | UN~[10-10000]  |
| Texp6                        | T           | UN~[10-5000]   |
| Nanc6                        | N           | UN~[10-5000]   |

**Table S1 (Continue) – Step 2b<sub>ii</sub>**

| <b>Demographic Parameter</b>          | <b>Type</b> | <b>Prior</b>   |
|---------------------------------------|-------------|----------------|
| N11(>Nbot1)                           | N           | UN~[1, 5000]   |
| N21(>Nbot1)                           | N           | UN~[1, 5000]   |
| N31(>Nbot1)                           | N           | UN~[1, 5000]   |
| Tisol1(<Texp1)                        | T           | UN~[10, 5000]  |
| Nexp1(>N11, N12,N13)                  | N           | UN~[11, 10000] |
| Texp1                                 | T           | UN~[10, 5000]  |
| Nbot1                                 | N           | UN~[1, 10]     |
| db1                                   | T           | UN~[1, 10]     |
| Nanc1                                 | N           | UN~[10, 20000] |
| N12                                   | N           | UN~[1, 100]    |
| N22                                   | N           | UN~[1, 100]    |
| N32                                   | N           | UN~[1, 100]    |
| Tcrash12                              | T           | UN~[1, 5]      |
| Niso12(>N12)                          | N           | UN~[1, 5000]   |
| Tcrash22                              | T           | UN~[1, 5]      |
| Niso22(>N22)                          | N           | UN~[1, 5000]   |
| Tcrash23                              | T           | UN~[1, 5]      |
| Niso23(>N32)                          | N           | UN~[1, 5000]   |
| Tisol2(>Tcrash12, Tcrash22, Tcrash23) | T           | UN~[10, 5000]  |
| Nexp2                                 | N           | UN~[11, 10000] |
| Texp2(>Tisol2)                        | T           | UN~[10, 5000]  |
| Nbot2                                 | N           | UN~[1, 10]     |
| db2                                   | T           | UN~[1, 10]     |
| Nanc2                                 | N           | UN~[10, 20000] |

**Table S2.** Mutation model parameters for the ABC analysis figure 2

| <b>Microsatellites mutation parameter</b> | <b>GSM (40 steps allowed)</b>                                            |
|-------------------------------------------|--------------------------------------------------------------------------|
| $\bar{\mu}_{mic}$                         | UN~[1 x 10 <sup>-4</sup> – 1 x10 <sup>-3</sup> ]                         |
| $G_{\mu mic}$                             | GA~[1 x 10 <sup>-5</sup> , 1 x 10 <sup>-2</sup> , $\bar{\mu}_{mic}$ , 2] |
| $\bar{P}$                                 | UN~[1 x 10 <sup>-1</sup> , 3 x 10 <sup>-1</sup> ]                        |
| GP                                        | GA~[1 x10 <sup>-2</sup> , 9 x 10 <sup>-1</sup> , $\bar{P}$ , 2]          |
| SNI                                       | LU~[1 x10 <sup>-8</sup> , 1 x10 <sup>-5</sup> ]                          |
| $G_{SNI}$                                 | GA~[1 x10 <sup>-9</sup> , 1 x10 <sup>-4</sup> , SNI, 2]                  |
| <b>MtDNA mutation parameter</b>           | HKY ( <i>p-inv</i> : 15.6, $\alpha$ : 99.8)                              |
| $\mu_{seq}$                               | UN~[1 x 10 <sup>-7</sup> , 1 x 10 <sup>-5</sup> ]                        |
| <i>KI</i>                                 | UN~[0.050, 20]                                                           |

The mutation model parameters for the microsatellite loci were the mean mutation rate ( $\mu_{mic}$ ), the parameter determining the shape of the gamma distribution of individual loci mutation rate ( $P$ ), and the Single Insertion Nucleotide rate (*SNI*). The mtDNA mutation model was is an HKY with two variable parameters, the per-site and generation mutation rate ( $\mu_{seq}$ ) and the transition/transversion ratio (*KI*) parameter, and two fixed parameters, the proportion of constant sites (*p-inv.*), and the shape of the Gamma distribution of mutations among sites ( $\alpha$ ).

**Table. S3.** Effective population size ( $N_e$ ) estimated in each population of the Yangtze finless porpoise. Values have been calculated using an estimator based on linkage disequilibrium between loci in *NeEstimate* [20], using an ABC approach in *ONESAMP* [21], and using DIYABC under SC2 Fig. 2bii.

|                                                    | <b>XCSS</b>         | <b>TL</b>            | <b>PY</b>            | <b>Admix</b> | <b>Total</b> |
|----------------------------------------------------|---------------------|----------------------|----------------------|--------------|--------------|
| <b><i>LD-NeEstimate</i></b><br><i>Mean [95%CI]</i> | 13 [7-25]           | 80 [23-∞]            | 89 [47-298]          | 106 [56-406] | 288          |
| <b><i>ONESAMP</i></b><br><i>Mean [95%CI]</i>       | 22 [11-26]          | 18 [15-28]           | 62 [45-115]          | 80 [56-142]  | 182          |
| <b><i>DIYABC</i></b><br><i>Mode (mean) [95%CI]</i> | 14 (42)<br>[7 – 95] | 32 (55)<br>[11 – 98] | 35 (50)<br>[11 – 66] | -            | -            |

**Table. S4.** Estimated recent migration (upper and lower matrix) and non-migration rates (along the diagonal) per generation between populations identified by *Structure*. Values are provided as geometric mean (median) [95% Highest probability density intervals].

| To:<br>From: | <b>Admix</b>                                             | <b>PY</b>                           | <b>TL</b>                                                | <b>XCSS</b>                                              |
|--------------|----------------------------------------------------------|-------------------------------------|----------------------------------------------------------|----------------------------------------------------------|
| <b>Admix</b> | 0.792 (0.791)<br>[0.696 –<br>0.893]                      | 0.011 (0.014)<br>[0.000 –<br>0.045] | <b>0.208 (0.238)</b><br><b>[0.085 –</b><br><b>0.315]</b> | <b>0.276 (0.282)</b><br><b>[0.222 –</b><br><b>0.326]</b> |
| <b>PY</b>    | <b>0.185 (0.195)</b><br><b>[0.095 –</b><br><b>0.292]</b> | 0.972 (0.975)<br>[0.941 –<br>0.997] | 0.056 (0.061)<br>[0.000 –<br>0.211]                      | 0.015 (0.019)<br>[0.000 –<br>0.069]                      |
| <b>TL</b>    | 0.004 (0.005)<br>[0.000 –<br>0.019]                      | 0.003 (0.004)<br>[0.000 –<br>0.016] | 0.682 (0.678)<br>[0.667 –<br>0.713]                      | 0.009 (0.011)<br>[0.000 –<br>0.045]                      |
| <b>XCSS</b>  | 0.004 (0.005)<br>[0.000 –<br>0.022]                      | 0.003 (0.004)<br>[0.000 –<br>0.016] | 0.009 (0.011)<br>[0.000 –<br>0.046]                      | 0.682 (0.678)<br>[0.667 –<br>0.711]                      |

(non-zero migration rate values are in bold font)

**Table S5.** Model selection procedure and performance analysis for the ABC step 1 (see figure 2a).

|                                                          | SC1                | SC2           | SC3           | SC4           | SC5           | SC6           | SC7          | SC8           | SC9           | SC10          |
|----------------------------------------------------------|--------------------|---------------|---------------|---------------|---------------|---------------|--------------|---------------|---------------|---------------|
| <b>Post. Prob.</b>                                       | <b>66.7%</b>       | 1.3%          | 1.4%          | 7.7%          | 5.8%          | 7.1%          | 2.8%         | 3.3%          | 2.4%          | 1.5%          |
| <b>95%CI</b>                                             | <b>[65.6-67.8]</b> | [1.2 - 1.5]   | [1.2 – 1.6]   | [7.1 – 8.2]   | [5.3 – 6.2]   | [6.6 – 7.7]   | [2.5 – 3.0]  | [3.0 – 3.6]   | [2.1 – 2.6]   | [1.3 – 1.7]   |
| <b>Performance analysis</b>                              |                    |               |               |               |               |               |              |               |               |               |
| (based on 300 Pseudo Observed simulated Data sets, PODs) |                    |               |               |               |               |               |              |               |               |               |
|                                                          | SC1                | SC2           | SC3           | SC4           | SC5           | SC6           | SC7          | SC8           | SC9           | SC10          |
| <b>D1</b>                                                | <b>61.4%</b>       | <b>11.6%†</b> | <b>18.3%†</b> | <b>14.3%†</b> | <b>13.7%†</b> | <b>12.0%†</b> | <b>9.0%†</b> | <b>14.0%†</b> | <b>11.8%†</b> | <b>11.7%†</b> |
| <b>D2</b>                                                | <b>1.7%*</b>       | 38.5%         | 17.6%         | 0.7%          | 1.8%          | 1.0%          | 0.3%         | 0.7%          | 0.0%          | 18.7%         |
| <b>D3</b>                                                | <b>7.6%*</b>       | 21.1%         | 30.0%         | 3.0%          | 2.4%          | 4.0%          | 3.0%         | 6.0%          | 3.0%          | 17.7%         |
| <b>D4</b>                                                | <b>3.0%*</b>       | 1.0%          | 1.3%          | 40.3%         | 24.0%         | 20.0%         | 1.0%         | 1.0%          | 1.6%          | 1.0%          |
| <b>D5</b>                                                | <b>9.7%*</b>       | 2.3%          | 4.3%          | 18.6%         | 33.4%         | 22.3%         | 4.3%         | 5.3%          | 6.0%          | 5.3%          |
| <b>D6</b>                                                | <b>2.3%*</b>       | 1.6%          | 1.0%          | 18.0%         | 17.1%         | 35.3%         | 1.0%         | 0.7%          | 0.7%          | 0.3%          |
| <b>D7</b>                                                | <b>3.0%*</b>       | 0.3%          | 1.0%          | 1.7%          | 1.0%          | 1.7%          | 34.0%        | 17.3%         | 23.3%         | 0.3%          |
| <b>D8</b>                                                | <b>7.0%*</b>       | 1.7%          | 4.7%          | 3.0%          | 5.5%          | 3.3%          | 23.0%        | 34.0%         | 18.0%         | 2.7%          |
| <b>D9</b>                                                | <b>2.3%*</b>       | 0.0%          | 0.7%          | 0.0%          | 0.8%          | 0.3%          | 23.0%        | 20.7%         | 35.3%         | 0.3%          |
| <b>D10</b>                                               | <b>2.0%*</b>       | 22.0%         | 21.0%         | 0.3%          | 0.3%          | 0.0%          | 1.3%         | 0.3%          | 0.3%          | 42.0%         |
| <b>Model check</b>                                       |                    |               |               |               |               |               |              |               |               |               |
| (number of outlying statistics, table S4)                |                    |               |               |               |               |               |              |               |               |               |
| <b>P &lt; 0.05</b>                                       | 1                  | 3             | 7             | 9             | 4             | 8             | 2            | 4             | 4             | 1             |
| <b>P &lt; 0.01</b>                                       | 4                  | 1             | 2             | 1             | 0             | 2             | 2            | 0             | 0             | 3             |
| <b>P &lt; 0.001</b>                                      | 0                  | 0             | 0             | 0             | 0             | 0             | 0            | 0             | 0             | 1             |

D: proportion of case in which the simulation-based model choice procedure was able to select a scenario as the most probable with non-overlapping confidence intervals of the posterior probabilities of each scenario.

\* Type-I or  $\alpha$ -error rate; † Type-II or  $\beta$ -error rate and that  $1 - \sum \beta_i$  provide the power of the model choice procedure.

**Table S6.** Model checking for the first step (see figure 2a).

|     | OBS.<br>VALUE | SC1                   | SC2            | SC3           | SC4            | SC5           | SC6            | SC7            | SC8           | SC9           | SC10           |
|-----|---------------|-----------------------|----------------|---------------|----------------|---------------|----------------|----------------|---------------|---------------|----------------|
| MGW | 0.5121        | <b>0.0055</b><br>(**) | 0.0130<br>(*)  | 0.0105<br>(*) | 0.0120<br>(*)  | 0.0115<br>(*) | 0.0100<br>(**) | 0.0090<br>(**) | 0.0220<br>(*) | 0.0115<br>(*) | 0.0065<br>(**) |
| MGW | 0.4598        | <b>0.0065</b><br>(**) | 0.0175<br>(*)  | 0.01<br>(**)  | 0.0175<br>(*)  | 0.0160<br>(*) | 0.0220<br>(*)  | 0.0110<br>(*)  | 0.0175<br>(*) | 0.0130<br>(*) | 0.0165<br>(*)  |
| MGW | 0.4403        | <b>0.006</b><br>(**)  | 0.0115<br>(*)  | 0.01<br>(**)  | 0.0100<br>(**) | 0.0125<br>(*) | 0.0060<br>(**) | 0.0035<br>(**) | 0.0150<br>(*) | 0.0200<br>(*) | 0.0060<br>(**) |
| DM2 | 5.0991        | <b>0.955</b><br>(*)   | 0.87           | 0.9095        | 0.9610<br>(*)  | 0.9570<br>(*) | 0.9720<br>(*)  | 0.888          | 0.866         | 0.872         | 0.9115         |
| NHA | 1             | <b>0.053</b>          | 0.0605         | 0.0475<br>(*) | 0.0455<br>(*)  | 0.059         | 0.0485<br>(*)  | 0.0755         | 0.066         | 0.0825        | 0.0665         |
| NSS | 0             | <b>0.053</b>          | 0.0605         | 0.0475<br>(*) | 0.0455<br>(*)  | 0.059         | 0.0485<br>(*)  | 0.0755         | 0.066         | 0.0825        | 0.0665         |
| MPD | 0             | <b>0.053</b>          | 0.0605         | 0.0475<br>(*) | 0.0455<br>(*)  | 0.059         | 0.0485<br>(*)  | 0.0755         | 0.066         | 0.0825        | 0.0665         |
| VPD | 0             | <b>0.053</b>          | 0.0605         | 0.0475<br>(*) | 0.0455<br>(*)  | 0.059         | 0.0485<br>(*)  | 0.0755         | 0.066         | 0.0825        | 0.0665         |
| MNS | 0             | <b>0.053</b>          | 0.0605         | 0.0475<br>(*) | 0.0455<br>(*)  | 0.059         | 0.0485<br>(*)  | 0.0755         | 0.066         | 0.0825        | 0.0665         |
| HST | 0.7656        | <b>0.995</b><br>(**)  | 0.9950<br>(**) | 0.986<br>(*)  | 0.9740<br>(*)  | 0.9565<br>(*) | 0.9530<br>(*)  | 0.9570<br>(*)  | 0.9790<br>(*) | 0.9640<br>(*) | 0.9940<br>(**) |

Scenarios are shown in figure 2. The probability  $Prob. (S_{simul.} < S_{obs.})$  for each summary statistic is calculated from 1,000 PODs simulated from the posterior distributions of parameters obtained under the each focal scenario. Corresponding tail-area probabilities ( $p$ -values) were obtained as  $Prob. (S_{simul.} < S_{obs.})$  and  $1.0 - Prob. (S_{simul.} < S_{obs.})$  for  $Prob. (S_{simul.} < S_{obs.}) \leq 0.5$  and  $> 0.5$ , respectively (\*, \*\*, \*\*\* = tail-area probability  $< 0.05$ ,  $< 0.01$  and  $< 0.001$ , respectively). In addition to the statistics used during the model choice procedure, the model check procedure used also two samples statistics including the mean number of alleles, mean genetic diversity, and mean size variance for microsatellite loci; and for mtDNA the within sample statistics including mean number of the rarest nucleotide at segregating sites and its variance, and the two samples statistics comprising the number of haplotypes and number of segregating sites. Only significant summary statistics for at least one scenario are shown. Abbreviations for the summary statistics are as follows: Mean Garcia-Williamson index (MGW),  $d\mu^2$  distance (DM2); Number of mtDNA haplotypes (NHA); Number of segregating site (NSS); Mean pairwise difference (MPD); Variance of pairwise difference (VPD); Mean number of the rarest nucleotide at segregating sites (MSN), Hudson's  $F_{ST}$ -statistics (HST)

**Table S7.** Model selection procedure and performance analysis for the ABC step 2*bi* (figure 2*bi*).

|                                                                     | SC1            | SC2           | SC3                  | SC4           | SC5         | SC6           |
|---------------------------------------------------------------------|----------------|---------------|----------------------|---------------|-------------|---------------|
| <b>Post.Pr</b>                                                      | 6.10%          | 3.40%         | <b>77.80%</b>        | 4.50%         | 7.20%       | 0.10%         |
| <b>95%CI</b>                                                        | [5.6 – 6.7]    | [3.0 – 3.9]   | <b>[76.8 – 78.9]</b> | [4.0 – 4.9]   | [6.7 - 7.7] | [0.0 – 0.1]   |
| <b>Performance analysis</b><br>(based on 300 simulations)           |                |               |                      |               |             |               |
|                                                                     | SC1            | SC2           | SC3                  | SC4           | SC5         | SC6           |
| <b>D1</b>                                                           | 47.30%         | 17.30%        | <b>13.70%*</b>       | 6.70%         | 7.30%       | 0.00%         |
| <b>D2</b>                                                           | 14.00%         | 60.00%        | <b>7.00%*</b>        | 2.33%         | 4.70%       | 0.00%         |
| <b>D3</b>                                                           | <b>11.30%†</b> | <b>5.30%†</b> | <b>37.30%</b>        | <b>6.30%†</b> | <b>13%†</b> | <b>0.30%†</b> |
| <b>D4</b>                                                           | 8.70%          | 9.30%         | <b>20.30%*</b>       | 78.70%        | 34.00%      | 0.00%         |
| <b>D5</b>                                                           | 18.30%         | 6.30%         | <b>20.70%*</b>       | 12.00%        | 41.00%      | 0.00%         |
| <b>D6</b>                                                           | 0.30%          | 1.70%         | <b>1.00%*</b>        | 0.00%         | 0.00%       | 99.70%        |
| <b>Model check</b><br>(number of outlying statistics, see table S6) |                |               |                      |               |             |               |
| <b>P &lt; 0.05</b>                                                  | 8              | 4             | <b>0</b>             | 9             | 1           | 7             |
| <b>P &lt; 0.01</b>                                                  | 2              | 1             | <b>1</b>             | 0             | 4           | 0             |
| <b>P &lt; 0.001</b>                                                 | 0              | 0             | <b>0</b>             | 3             | 0           | 0             |

(see the legend of tabe S5)



**Table S8:** Model checking for the ABC step 2*bi* (figure 2*bi*).

|           | Obs.<br>value | SC1            | SC2            | SC3                   | SC4             | SC5            | SC6           |
|-----------|---------------|----------------|----------------|-----------------------|-----------------|----------------|---------------|
| VAR_1_1   | 11.2626       | 0.686          | 0.68           | <b>0.43</b>           | 0.9600<br>(*)   | 0.85           | 0.644         |
| VAR_1_2   | 16.2651       | 0.833          | 0.836          | <b>0.618</b>          | 0.9850<br>(*)   | 0.937          | 0.834         |
| VAR_1_3   | 15.9953       | 0.837          | 0.823          | <b>0.627</b>          | 0.9870<br>(*)   | 0.928          | 0.843         |
| MGW_1_1   | 0.5121        | 0.0070<br>(**) | 0.0130<br>(*)  | <b>0.0975</b>         | 0.0000<br>(***) | 0.0040<br>(**) | 0.0350<br>(*) |
| MGW_1_2   | 0.4598        | 0.0135<br>(*)  | 0.0190<br>(*)  | <b>0.12</b>           | 0.0010<br>(***) | 0.0030<br>(**) | 0.0365<br>(*) |
| MGW_1_3   | 0.4403        | 0.0115<br>(*)  | 0.0090<br>(**) | <b>0.136</b>          | 0.0010<br>(***) | 0.0050<br>(**) | 0.0375<br>(*) |
| V2P_1_1&2 | 13.0832       | 0.738          | 0.74           | <b>0.489</b>          | 0.9710<br>(*)   | 0.882          | 0.725         |
| V2P_1_1&3 | 12.4376       | 0.719          | 0.722          | <b>0.469</b>          | 0.9660<br>(*)   | 0.873          | 0.683         |
| V2P_1_2&3 | 16.8347       | 0.847          | 0.829          | <b>0.616</b>          | 0.9870<br>(*)   | 0.935          | 0.8355        |
| FST_1_1&2 | 0.0484        | 0.7255         | 0.7345         | <b>0.573</b>          | 0.3995          | 0.597          | 0.0425<br>(*) |
| FST_1_2&3 | 0.0533        | 0.667          | 0.737          | <b>0.559</b>          | 0.3885          | 0.591          | 0.0475<br>(*) |
| LIK_1_1&2 | 1.2477        | 0.242          | 0.338          | <b>0.241</b>          | 0.3765          | 0.365          | 0.0480<br>(*) |
| DM2_1_1&2 | 5.0991        | 0.9620<br>(*)  | 0.9570<br>(*)  | <b>0.898</b>          | 0.9750<br>(*)   | 0.9790<br>(*)  | 0.913         |
| DM2_1_2&3 | 3.638         | 0.904          | 0.895          | <b>0.739</b>          | 0.9580<br>(*)   | 0.942          | 0.754         |
| NHA_2_3   | 1             | 0.0475<br>(*)  | 0.064          | <b>0.088</b>          | 0.055           | 0.057          | 0.1035        |
| NSS_2_3   | 0             | 0.0475<br>(*)  | 0.064          | <b>0.088</b>          | 0.055           | 0.057          | 0.1035        |
| MPD_2_3   | 0             | 0.0475<br>(*)  | 0.064          | <b>0.088</b>          | 0.055           | 0.057          | 0.1035        |
| VPD_2_3   | 0             | 0.0475<br>(*)  | 0.064          | <b>0.088</b>          | 0.055           | 0.057          | 0.1035        |
| MNS_2_3   | 0             | 0.0475<br>(*)  | 0.064          | <b>0.088</b>          | 0.055           | 0.057          | 0.1035        |
| HST_2_2&3 | 0.7656        | 0.9920<br>(**) | 0.9790<br>(*)  | <b>0.9900</b><br>(**) | 0.9820<br>(*)   | 0.9940<br>(**) | 0.9660<br>(*) |

The probability  $Prob.(S_{simul.} < S_{obs.})$  given for each summary statistic was calculated from 1,000 virtual datasets simulated from the posterior distributions of parameters obtained under the focused scenario. Corresponding tail-area probabilities ( $p$ -values) were obtained as  $Prob.(S_{simul.} < S_{obs.})$  and  $1.0 - Prob.(S_{simul.} < S_{obs.})$  for  $Prob.(S_{simul.} < S_{obs.}) \leq 0.5$  and  $> 0.5$ , respectively (\*, \*\*, \*\*\* = tail-area probability  $< 0.05$ ,  $< 0.01$  and  $< 0.001$ , respectively). In addition to the statistics used during the model choice procedure, the model check procedure used also two samples statistics including the mean number of alleles, mean genetic diversity, and mean size variance for microsatellite loci; and for mtDNA the within sample statistics including mean number of the rarest nucleotide at segregating sites and its variance, and the two samples statistics comprising the number of haplotypes and number of segregating sites. Only significant summary statistics for at least one scenario are shown. Abbreviations for the summary statistics are as follows: Mean size variance (VAR); Mean Garcia-Williamson index (MGW); Variance of pairwise difference (V2P);  $F_{ST}$  between 2 samples (FST);  $d_{\mu}^2$  distance (DM2); Classification index (LIK); Number of mtDNA haplotypes (NHA); Number of segregating sites (NSS); Mean pairwise difference (MPD); Variance of pairwise difference (VPD); Mean number of the rarest nucleotide at segregating sites (MSN); Hudson's  $F_{ST}$ -statistics (HST).

**Table S9.** Model selection procedure and performance analysis for the ABC step *2bii* (figure *2bii*).

|                                                            | SC1           | SC2                  |
|------------------------------------------------------------|---------------|----------------------|
| Post. Pr                                                   | 21.8%         | <b>78.2%</b>         |
| 95%CI                                                      | [21.1 – 22.5] | <b>[77.5 – 78.9]</b> |
| <b>Performance analysis</b><br>(based on 1000 simulations) |               |                      |
| Decision                                                   | SC1           | SC2                  |
| <b>D1</b>                                                  | 86.50%        | <b>14.50%</b>        |
| <b>D2</b>                                                  | 13.50%        | <b>85.50%</b>        |
| <b>Model check</b><br>(number of outlying statistics)      |               |                      |
| $P < 0.05$                                                 | 0             | <b>0</b>             |
| $P < 0.01$                                                 | 1             | <b>1</b>             |
| $P < 0.001$                                                | 0             | <b>0</b>             |

(see legend of tabe S5)

**Table S10.** Model checking for the analysis for the ABC step *2bii* (figure *2bii*).

|           | Obs. value | SC1        | SC2        |
|-----------|------------|------------|------------|
| HST_2_2&3 | 0.7656     | 0.9950(**) | 0.9950(**) |

(See legend table S4)

**Table S11.** Parameter estimation for scenario SC2 in natural units (Fig. 2*b<sub>ii</sub>*).

|                | mean     | mode            | Q <sub>2.5</sub> | Q <sub>5.0</sub> | Q <sub>25.0</sub> | median   | Q <sub>75.0</sub> | Q <sub>95.0</sub> | Q <sub>97.5</sub> |
|----------------|----------|-----------------|------------------|------------------|-------------------|----------|-------------------|-------------------|-------------------|
| $N_{14-PY}$    | 49.6     | <b>35.3</b>     | 11.3             | 14.6             | 29.7              | 46.5     | 68.3              | 92.7              | 96.0              |
| $N_{24-TL}$    | 54.8     | <b>32.3</b>     | 11.4             | 15.5             | 32.9              | 53.8     | 77.2              | 95.8              | 97.9              |
| $N_{34-XCSS}$  | 42.3     | <b>13.9</b>     | 6.9              | 8.8              | 20.0              | 36.3     | 62.5              | 91.0              | 95.4              |
| $N_{iso14}$    | 2,520.0  | <b>2,090.0</b>  | 599.0            | 772.0            | 1,580.0           | 2,380.0  | 3,410.0           | 4,620.0           | 4,810.0           |
| $N_{iso24}$    | 2,450.0  | <b>1,720.0</b>  | 591.0            | 756.0            | 1,530.0           | 2,300.0  | 3,300.0           | 4,600.0           | 4,790.0           |
| $N_{iso34}$    | 2,420.0  | <b>2,030.0</b>  | 578.0            | 758.0            | 1,470.0           | 2,250.0  | 3,280.0           | 4,600.0           | 4,800.0           |
| $N_{exp4}$     | 6,580.0  | <b>5,660.0</b>  | 2,900.0          | 3,360.0          | 5,090.0           | 6,570.0  | 8,170.0           | 9,620.0           | 9,840.0           |
| $N_{bot4}$     | 6.8      | <b>10.0</b>     | 1.8              | 2.6              | 5.1               | 7.1      | 8.7               | 10.0              | 10.0              |
| $N_{anc4}$     | 13,300.0 | <b>18,700.0</b> | 3,480.0          | 4,830.0          | 10,100.0          | 13,900.0 | 17,200.0          | 19,500.0          | 19,700.0          |
| $T_{crash14}$  | 3.0      | <b>1.0</b>      | 1.0              | 1.0              | 1.5               | 2.9      | 4.5               | 5.0               | 5.0               |
| $T_{crash24}$  | 2.6      | <b>1.0</b>      | 1.0              | 1.0              | 1.2               | 2.2      | 3.7               | 5.0               | 5.0               |
| $T_{crash34}$  | 3.2      | <b>5.0</b>      | 1.0              | 1.0              | 2.1               | 3.4      | 4.6               | 5.0               | 5.0               |
| $T_{isol4}$    | 154.0    | <b>103.0</b>    | 21.4             | 31.4             | 76.7              | 126.0    | 200.0             | 365.0             | 448.0             |
| $T_{exp4}$     | 1,060.0  | <b>340.0</b>    | 130.0            | 178.0            | 394.0             | 682.0    | 1,320.0           | 3,410.0           | 4,100.0           |
| $db4$          | 6.1      | <b>6.4</b>      | 1.1              | 1.9              | 4.1               | 6.2      | 8.1               | 10.0              | 10.0              |
| $\mu_{mic\_1}$ | 5.81E-04 | <b>4.48E-04</b> | 2.13E-04         | 2.48E-04         | 4.11E-04          | 5.68E-04 | 7.48E-04          | 9.43E-04          | 9.76E-04          |
| $p_{mic\_1}$   | 2.48E-01 | <b>3.00E-01</b> | 1.26E-01         | 1.43E-01         | 2.19E-01          | 2.62E-01 | 2.89E-01          | 3.00E-01          | 3.00E-01          |
| $sni_{mic\_1}$ | 1.05E-06 | <b>1.00E-08</b> | 1.13E-08         | 1.31E-08         | 4.49E-08          | 2.16E-07 | 1.07E-06          | 5.54E-06          | 7.33E-06          |
| $u_{seq\_2}$   | 9.96E-07 | <b>5.61E-07</b> | 2.33E-07         | 2.94E-07         | 5.41E-07          | 8.16E-07 | 1.23E-06          | 2.27E-06          | 2.86E-06          |
| $kI_{seq\_2}$  | 1.02E+01 | <b>1.69E+01</b> | 5.52E-01         | 1.03E+00         | 5.10E+00          | 1.03E+01 | 1.52E+01          | 1.90E+01          | 1.95E+01          |

Evolutionary scenario SC2 are represented in Fig. 2*b<sub>ii</sub>*.; Effective population size is provided in term of diploid individuals;  
Time of the event are provided in generation before present. Q<sub>x</sub>: x % quantile.

**Table S12.** Composite parameter for the scenario SC2 (see Fig. 2bii)

| Parameter         | mean     | mode            | Q <sub>2.5</sub> | Q <sub>5.0</sub> | Q <sub>25.0</sub> | median   | Q <sub>75.0</sub> | Q <sub>95.0</sub> | Q <sub>97.5</sub> |
|-------------------|----------|-----------------|------------------|------------------|-------------------|----------|-------------------|-------------------|-------------------|
| N14(u+sni)_1      | 2.48E-02 | <b>1.36E-02</b> | 3.96E-03         | 5.41E-03         | 1.23E-02          | 2.05E-02 | 3.28E-02          | 5.95E-02          | 6.98E-02          |
| N24(u+sni)_1      | 3.12E-02 | <b>1.16E-03</b> | 9.00E-04         | 1.46E-03         | 7.78E-03          | 2.23E-02 | 4.91E-02          | 8.86E-02          | 9.51E-02          |
| N34(u+sni)_1      | 2.49E-02 | <b>1.09E-02</b> | 3.22E-03         | 4.56E-03         | 1.11E-02          | 1.99E-02 | 3.40E-02          | 6.34E-02          | 7.30E-02          |
| Niso14(u+sni)_1   | 2.87E+00 | <b>4.98E+00</b> | 2.99E-01         | 4.84E-01         | 1.71E+00          | 3.00E+00 | 4.09E+00          | 4.94E+00          | 4.98E+00          |
| Niso24(u+sni)_1   | 1.49E+00 | <b>1.05E+00</b> | 3.27E-01         | 4.27E-01         | 8.34E-01          | 1.26E+00 | 1.93E+00          | 3.43E+00          | 3.90E+00          |
| Niso34(u+sni)_1   | 1.15E+00 | <b>3.82E-01</b> | 1.22E-01         | 1.69E-01         | 4.39E-01          | 8.26E-01 | 1.54E+00          | 3.30E+00          | 3.96E+00          |
| Nexp4(u+sni)_1    | 4.88E+00 | <b>3.37E+00</b> | 3.82E-01         | 6.40E-01         | 2.55E+00          | 4.71E+00 | 7.20E+00          | 9.58E+00          | 9.98E+00          |
| Nbot4(u+sni)_1    | 3.73E-03 | <b>2.99E-03</b> | 9.11E-04         | 1.12E-03         | 2.32E-03          | 3.47E-03 | 4.91E-03          | 7.23E-03          | 7.96E-03          |
| Nanc4(u+sni)_1    | 4.32E+00 | <b>9.95E-01</b> | 2.54E-01         | 3.96E-01         | 1.41E+00          | 3.08E+00 | 5.99E+00          | 1.27E+01          | 1.51E+01          |
| Tcrash14(u+sni)_1 | 1.28E-03 | <b>6.16E-04</b> | 2.19E-04         | 2.68E-04         | 5.79E-04          | 1.01E-03 | 1.72E-03          | 3.29E-03          | 3.82E-03          |
| Tcrash24(u+sni)_1 | 2.14E-03 | <b>1.07E-04</b> | 1.38E-04         | 2.08E-04         | 9.14E-04          | 1.96E-03 | 3.23E-03          | 4.68E-03          | 4.94E-03          |
| Tcrash34(u+sni)_1 | 1.29E-03 | <b>1.09E-04</b> | 1.14E-04         | 1.25E-04         | 2.53E-04          | 6.67E-04 | 1.88E-03          | 4.50E-03          | 4.93E-03          |
| Tisol4(u+sni)_1   | 8.39E-02 | <b>3.21E-02</b> | 1.11E-02         | 1.49E-02         | 3.61E-02          | 6.20E-02 | 1.05E-01          | 2.18E-01          | 2.84E-01          |
| Texp4(u+sni)_1    | 1.92E-01 | <b>3.05E-02</b> | 1.99E-02         | 2.28E-02         | 4.45E-02          | 8.66E-02 | 1.98E-01          | 6.94E-01          | 1.04E+00          |
| db4(u+sni)_1      | 3.87E-03 | <b>1.49E-03</b> | 5.99E-04         | 8.27E-04         | 2.03E-03          | 3.51E-03 | 5.43E-03          | 7.99E-03          | 8.63E-03          |
| N14useq_2         | 4.92E-05 | <b>2.32E-05</b> | 5.63E-06         | 8.53E-06         | 2.15E-05          | 3.72E-05 | 6.18E-05          | 1.28E-04          | 1.66E-04          |
| N24useq_2         | 5.58E-05 | <b>2.39E-06</b> | 1.24E-06         | 1.95E-06         | 7.34E-06          | 2.01E-05 | 5.53E-05          | 2.42E-04          | 3.69E-04          |
| N34useq_2         | 2.49E-05 | <b>7.08E-07</b> | 5.47E-07         | 7.63E-07         | 2.99E-06          | 8.41E-06 | 2.33E-05          | 1.00E-04          | 1.64E-04          |
| Niso14useq_2      | 2.01E-03 | <b>9.26E-04</b> | 3.75E-04         | 4.82E-04         | 9.97E-04          | 1.57E-03 | 2.45E-03          | 4.92E-03          | 6.25E-03          |
| Niso24useq_2      | 2.42E-03 | <b>1.06E-03</b> | 3.29E-04         | 4.38E-04         | 9.91E-04          | 1.69E-03 | 2.85E-03          | 6.69E-03          | 9.39E-03          |
| Niso34useq_2      | 3.96E-03 | <b>1.97E-04</b> | 8.98E-05         | 1.45E-04         | 6.19E-04          | 1.67E-03 | 4.47E-03          | 1.68E-02          | 2.34E-02          |
| Nexp4useq_2       | 9.61E-03 | <b>9.26E-04</b> | 4.98E-04         | 6.61E-04         | 1.84E-03          | 4.27E-03 | 1.06E-02          | 4.01E-02          | 5.57E-02          |
| Nbot4useq_2       | 4.77E-05 | <b>1.98E-07</b> | 1.24E-06         | 2.53E-06         | 1.79E-05          | 4.64E-05 | 7.65E-05          | 9.80E-05          | 9.83E-05          |
| Nanc4useq_2       | 3.52E-02 | <b>1.67E-02</b> | 2.84E-03         | 4.34E-03         | 1.36E-02          | 2.65E-02 | 4.82E-02          | 9.75E-02          | 1.16E-01          |
| Tcrash14useq_2    | 5.67E-06 | <b>1.49E-06</b> | 6.54E-07         | 9.02E-07         | 2.31E-06          | 4.27E-06 | 7.48E-06          | 1.52E-05          | 1.90E-05          |
| Tcrash24useq_2    | 2.63E-06 | <b>1.28E-06</b> | 3.89E-07         | 5.05E-07         | 1.15E-06          | 1.98E-06 | 3.30E-06          | 6.80E-06          | 8.71E-06          |
| Tcrash34useq_2    | 3.33E-06 | <b>1.06E-06</b> | 4.65E-07         | 6.09E-07         | 1.43E-06          | 2.54E-06 | 4.28E-06          | 8.69E-06          | 1.08E-05          |
| Tisol4useq_2      | 1.28E-04 | <b>4.49E-05</b> | 1.47E-05         | 2.12E-05         | 5.28E-05          | 9.44E-05 | 1.63E-04          | 3.43E-04          | 4.32E-04          |
| Texp4useq_2       | 3.15E-03 | <b>6.41E-05</b> | 5.07E-05         | 8.23E-05         | 3.87E-04          | 1.14E-03 | 3.29E-03          | 1.37E-02          | 1.99E-02          |
| db4useq_2         | 7.99E-06 | <b>2.42E-07</b> | 2.02E-07         | 2.93E-07         | 1.27E-06          | 3.57E-06 | 9.78E-06          | 3.10E-05          | 4.29E-05          |

## References:

1. Garza, J. C. & Williamson, E. G. 2001 Detection of reduction in population size using data from microsatellite loci. *Mol. Ecol.* **10**, 305–318. (doi:10.1046/j.1365-294x.2001.01190.x)
2. Weir, B. S. & Cockerham, C. C. 1984 Estimating F-statistics for the analysis of population structure. *Evolution*, 1358–1370.
3. Chakraborty, R. & Jin, L. 1993 A unified approach to study hypervariable polymorphisms: statistical considerations of determining relatedness and population distances. *EXS* **67**, 153–175.
4. Goldstein, D. B., Ruiz Linares, A., Cavalli-Sforza, L. L. & Feldman, M. W. 1995 An evaluation of genetic distances for use with microsatellite loci. *Genetics* **139**, 463–471.
5. Hudson, R. R., Slatkin, M. & Maddison, W. P. 1992 Estimation of levels of gene flow from DNA sequence data. *Genetics* **132**, 583–589.
6. Beaumont, M. A., Zhang, W. & Balding, D. J. 2002 Approximate Bayesian computation in population genetics. *Genetics* **162**, 2025–2035.
7. Estoup, A., Jarne, P. & Cornuet, J.-M. 2002 Homoplasy and mutation model at microsatellite loci and their consequences for population genetics analysis. *Mol. Ecol.* **11**, 1591–1604.
8. Durrin, D., Taboada, G. L., Doallo, R. & Posada, D. 2012 jModelTest 2: more models, new heuristics and parallel computing. *Nat Meth.* **9**, 772. (doi:10.1038/nmeth.2109)
9. Hasegawa, M., Kishino, H. & Yano, T. 1985 Dating of the human-ape splitting by a molecular clock of mitochondrial DNA. *J. Mol. Evol.* **22**, 160–174.
10. Alter, S. E. & Palumbi, S. R. 2009 Comparing evolutionary patterns and variability in the mitochondrial control region and cytochrome B in three species of baleen whales. *J. Mol. Evol.* **68**, 97–111. (doi:10.1007/s00239-008-9193-2)
11. Fontaine, M. C. et al. 2010 Genetic and historic evidence for climate-driven population fragmentation in a top cetacean predator: the harbour porpoises in European water. *Proc. R. Soc. B* **277**, 2829–2837. (doi:10.1098/rspb.2010.0412)
12. Cornuet, J.-M., Santos, F., Beaumont, M. A., Robert, C. P., Marin, J.-M., Balding, D. J., Guillemaud, T. & Estoup, A. 2008 Inferring population history with DIY ABC: a user-friendly approach to approximate Bayesian computation. *Bioinformatics* **24**, 2713–2719. (doi:10.1093/bioinformatics/btn514)
13. Cornuet, J.-M., Ravignie, V. & Estoup, A. 2010 Inference on population history and model checking using DNA sequence and microsatellite data with the software DIYABC (v1.0). *BMC Bioinform.* **11**, 401. (doi:10.1186/1471-2105-11-401)
14. Estoup, A., Lombaert, E., Marin, J.-M., Guillemaud, T., Pudlo, P., Robert, C. P. & Cornuet, J.-M. 2012 Estimation of demo-genetic model probabilities with Approximate Bayesian Computation using linear discriminant analysis on summary statistics. *Mol. Ecol. Resour.* **12**, 846–855. (doi:10.1111/j.1755-0998.2012.03153.x)
15. Gelman, A., Carlin, J. B., Stern, H. S., Dunson, D. B., Vehtari, A. & Rubin, D. B. 2004 *Bayesian Data Analysis, Second Edition*. CRC Press.
16. Zhao, X. et al. 2008 Abundance and conservation status of the Yangtze finless porpoise in the Yangtze River, China. *Biol. Conserv.* **141**, 3006–3018. (doi:10.1016/j.biocon.2008.09.005)
17. Mei, Z. et al. 2014 The Yangtze finless porpoise: On an accelerating path to extinction? *Biol. Conserv.* **172**, 117–123. (doi:10.1016/j.biocon.2014.02.033)
18. Dong, L., Wang, D., Wang, K., Li, S., Mei, Z., Wang, S., Akamatsu, T. & Kimura, S. 2015 Yangtze finless porpoises along the main channel of Poyang Lake, China: Implications for conservation. *Mar. Mamm. Sci.* **31**, 612–628. (doi:10.1111/mms.12181)
19. Szpiech, Z. A., Jakobsson, M. & Rosenberg, N. A. 2008 ADZE: a rarefaction approach for counting alleles private to combinations of populations. *Bioinformatics* **24**, 2498–2504. (doi:10.1093/bioinformatics/btn478)
20. Do, C., Waples, R. S., Peel, D., Macbeth, G. M., Tillett, B. J. & Ovenden, J. R. 2014 NeEstimator v2: re-implementation of software for the estimation of contemporary effective population size ( $N_e$ ) from genetic data. *Mol. Ecol. Resour.* **14**, 209–214. (doi:10.1111/1755-0998.12157)
21. Tallmon, D. A., Koyuk, A., Luikart, G. & Beaumont, M. A. 2008 ONESAMP: a program to estimate effective population size using approximate Bayesian computation. *Mol. Ecol. Resour.* **8**, 299–301. (doi:10.1111/j.1471-8286.2007.01997.x)
